# Supplementary material for: Novel diagnostic DNA methylation episignatures expand and refine the epigenetic landscapes of Mendelian disorders
Source: PubMed Central journal article supplement — HGG Adv. 2021 Dec 3;3(1):100075. doi: 10.1016/j.xhgg.2021.100075 (PMC8756545; doi:10.1016/j.xhgg.2021.100075), 2021-12-03
Supplement: mmc1.pdf [file mmc1.pdf]

## Supplemental information

### Novel diagnostic DNA methylation epigenatures

expand and refine the epigenetic

landscapes of Mendelian disorders

Michael A. Levy, Haley McConkey, Jennifer Kerkhof, Mouna Barat-Houari, Sara Bargiacchi, Elisa Biamino, María Palomares Bralo, Gerarda Cappuccio, Andrea Ciolfi, Angus Clarke, Barbara R. DuPont, Mariet W. Elting, Laurence Faivre, Timothy Fee, Robin S. Fletcher, Florian Cherik, Aidin Foroutan, Michael J. Friez, Cristina Gervasini, Sadegheh Haghshenas, Benjamin A. Hilton, Zandra Jenkins, Simranpreet Kaur, Suzanne Lewis, Raymond J. Louie, Silvia Maitz, Donatella Milani, Angela T. Morgan, Renske Oegema, Elsebet Østergaard, Nathalie Ruiz Pallares, Maria Piccione, Simone Pizzi, Astrid S. Plomp, Cathryn Poulton, Jack Reilly, Raissa Relator, Rocio Rius, Stephen Robertson, Kathleen Rooney, Justine Rousseau, Gijs W.E. Santen, Fernando Santos-Simarro, Josephine Schijns, Gabriella Maria Squeo, Miya St John, Christel Thauvin-Robinet, Giovanna Traficante, Pleuntje J. van der Sluijs, Samantha A. Vergano, Niels Vos, Kellie K. Walden, Dimitar Azmanov, Tugce Balci, Siddharth Banka, Jozef Gecz, Peter Henneman, Jennifer A. Lee, Marcel M.A.M. Mannens, Tony Roscioli, Victoria Siu, David J. Amor, Gareth Baynam, Eric G. Bend, Kym Boycott, Nicola Brunetti-Pierri, Philippe M. Campeau, John Christodoulou, David Dymont, Natacha Esber, Jill A. Fahrner, Mark D. Fleming, David Genevieve, Kristin D. Kerrnohan, Alisdair McNeill, Leonie A. Menke, Giuseppe Merla, Paolo Prontera, Cheryl Rockman-Greenberg, Charles Schwartz, Steven A. Skinner, Roger E. Stevenson, Antonio Vitobello, Marco Tartaglia, Marielle Alders, Matthew L. Tedder, and Bekim Sadikovic

**Supplementary Figure 1: Episignature discovery pipeline used to identify the 19 new episignatures.** A summary of the steps involved in sample processing and data analysis for identification and validation of a new episignature. Ordered steps are numbered, unordered elements are bulleted.

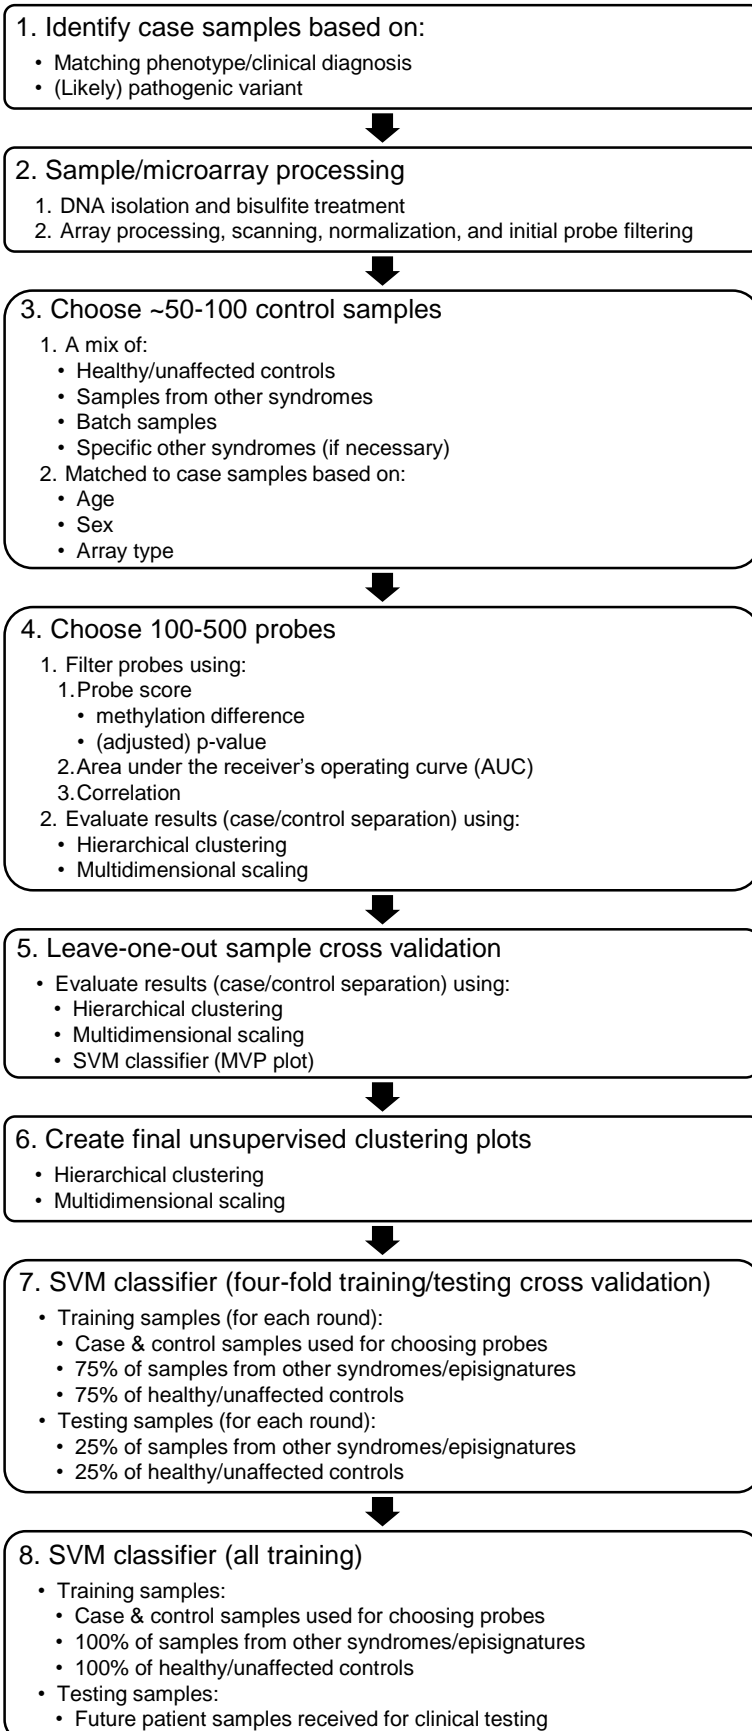

**A. ARTHS (*KAT6A*)**

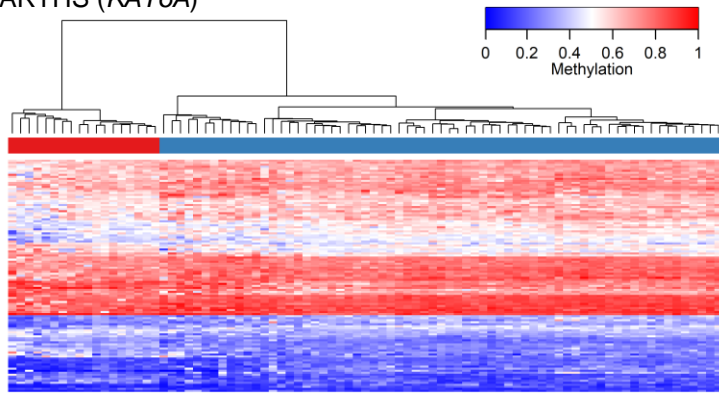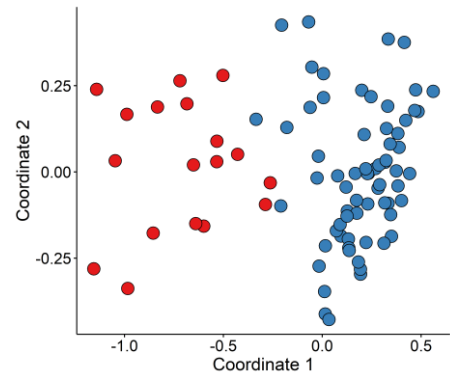

**B. BEFAHRS (*TET3*)**

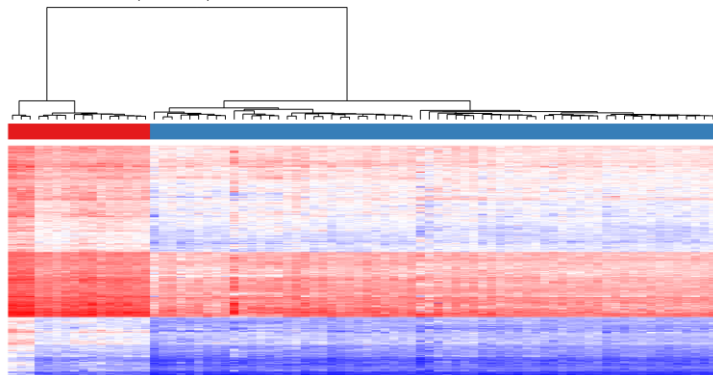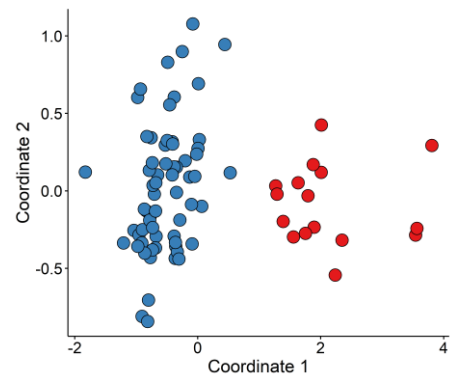

**C. Chr16p11.2del**

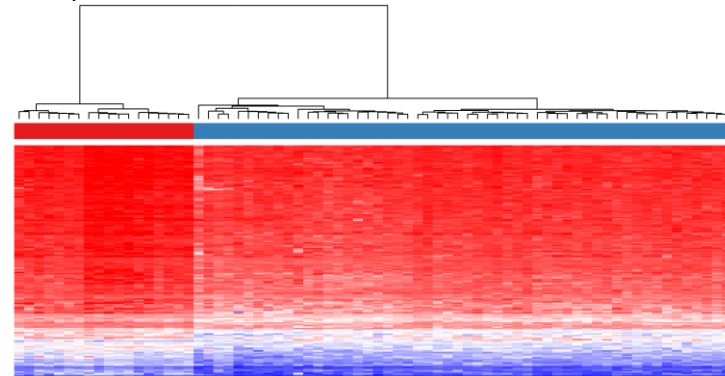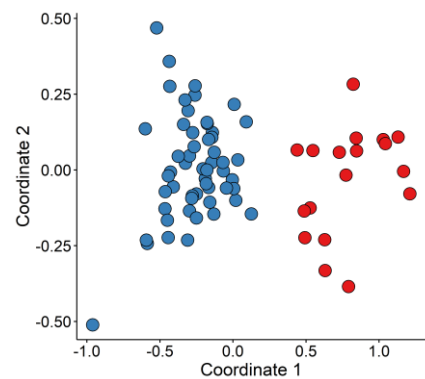

**Supplementary Figure 2: Unsupervised clustering using the selected probes for the 19 new epismutations.** For each epismutation, hierarchical clustering (left) and MDS plots (right) are shown. Unless indicated, red are case samples and blue are controls. The methylation scale bar in A. applies to the heatmap portion each panel.

**D. CSS1/2 (*ARID1A/B*) c.6200**

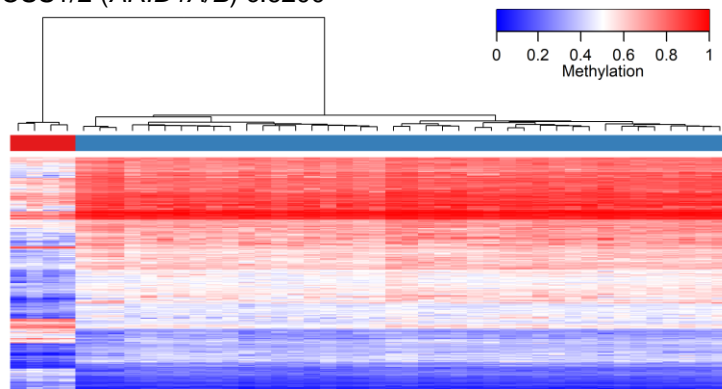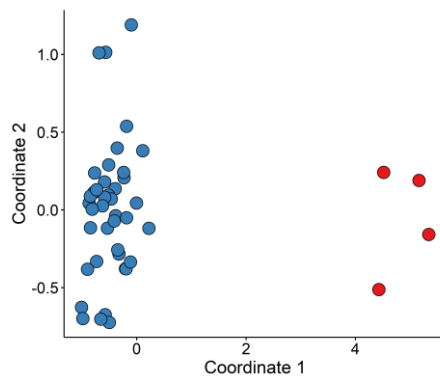

**E. CSS4 (*SMARCA4*) c.2656**

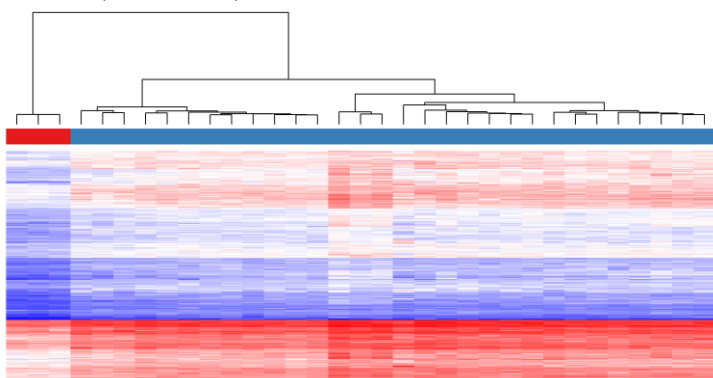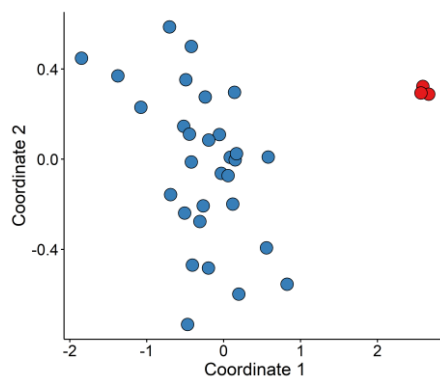

**F. CSS9 (*SOX11*)**

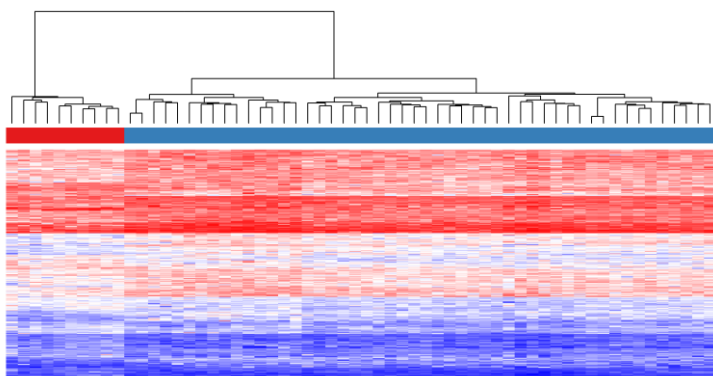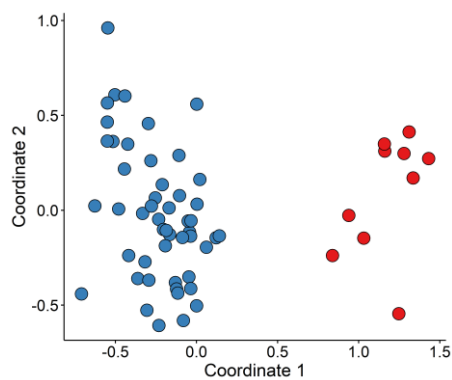

**G. DYT28 (*KMT2B*)**

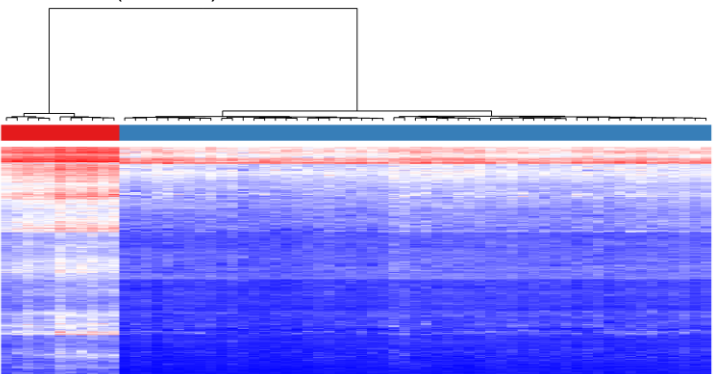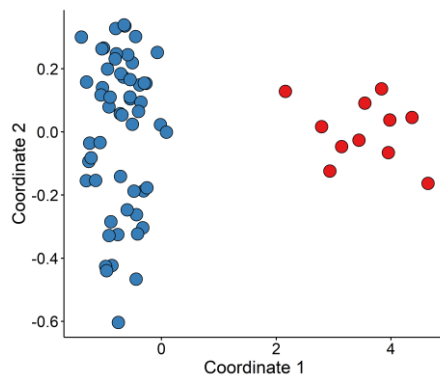

**Figure S2 continued**

### H. GADEV5 (YY1)

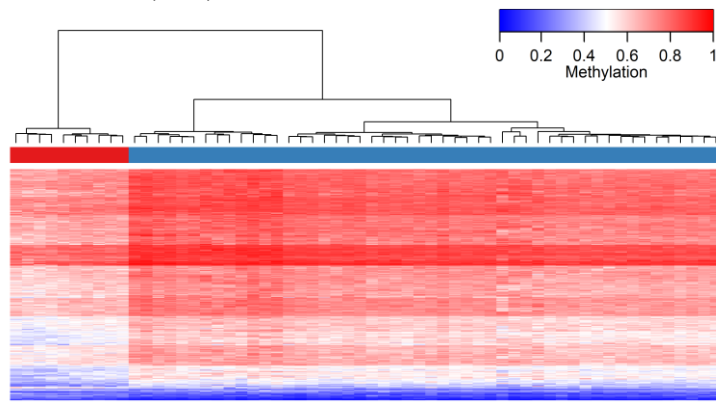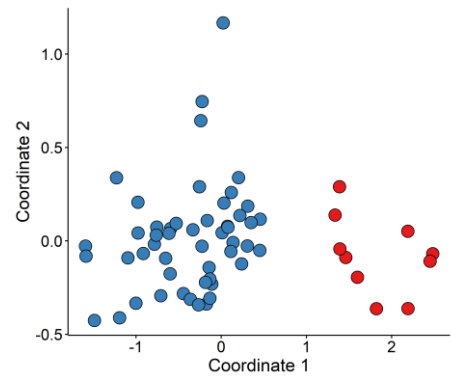

### I. KDM2B

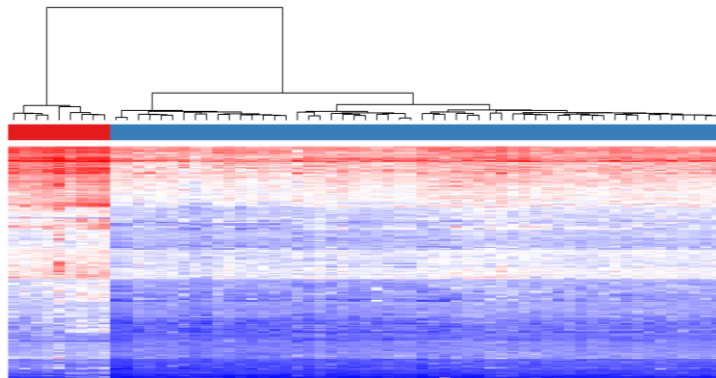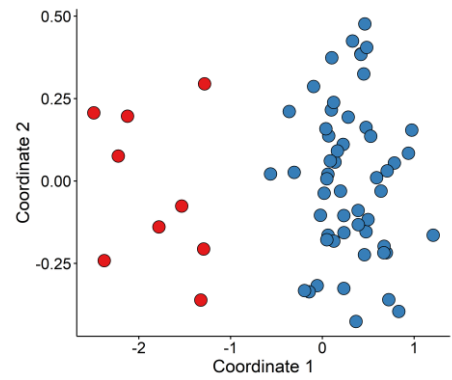

### J. KDM4B

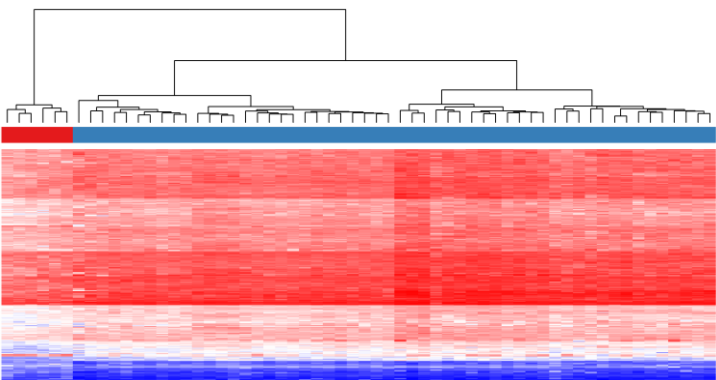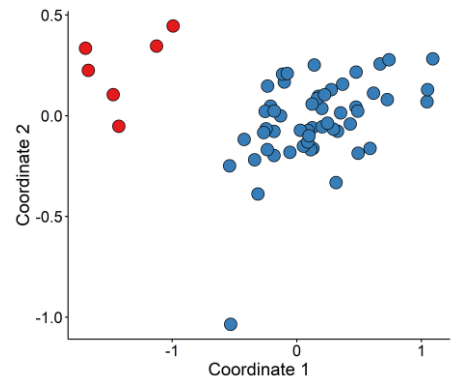

### K. LLS (SETD2)

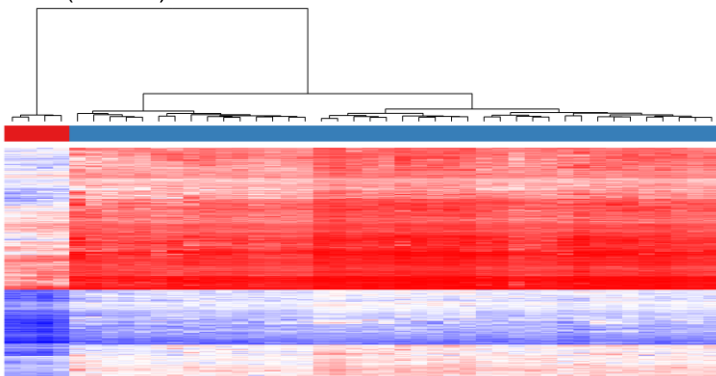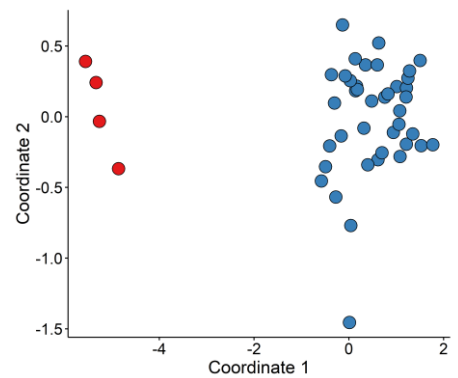

Figure S2 continued

L. MKHK1/2 (*CREBB/EP300*) ID4

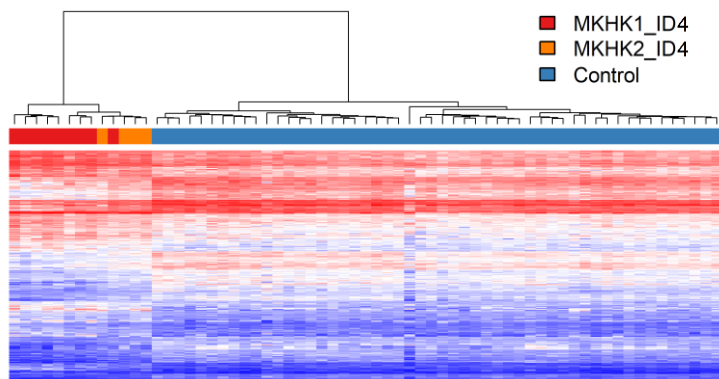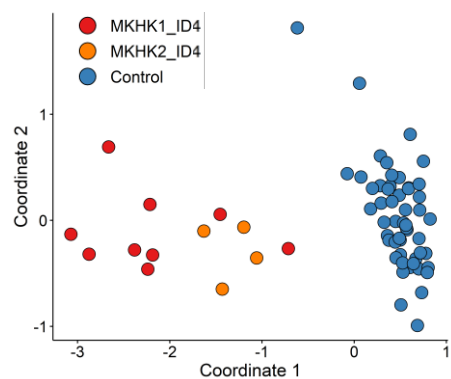

M. MLASA2 (*YARS2*)

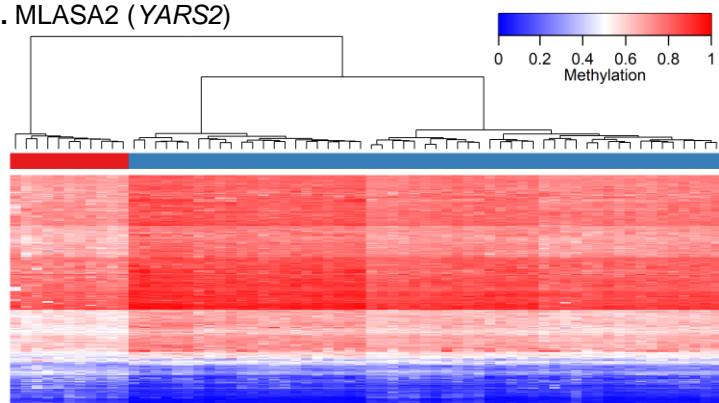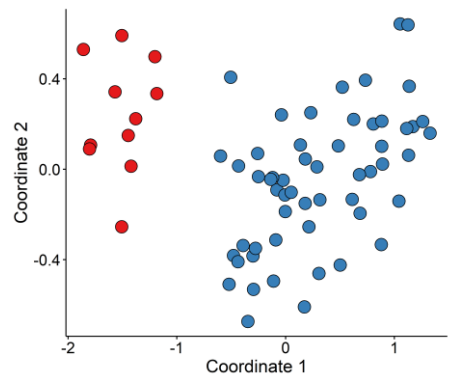

N. MRXSA (*FAM50A*)

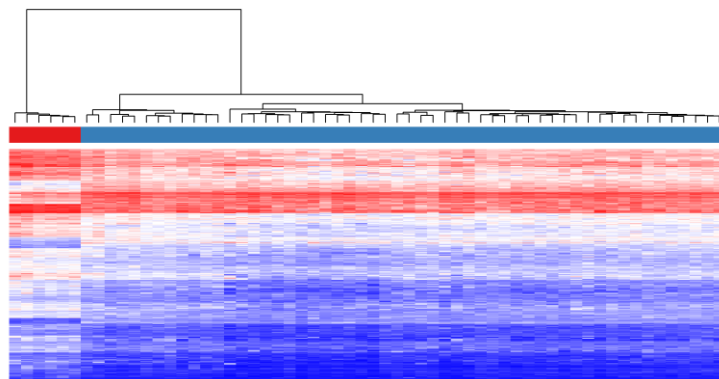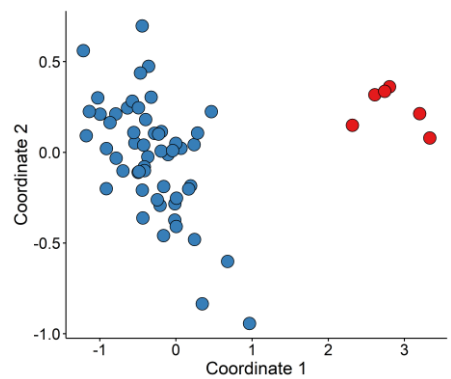

O. PHMDS (Chr22q13.3del)

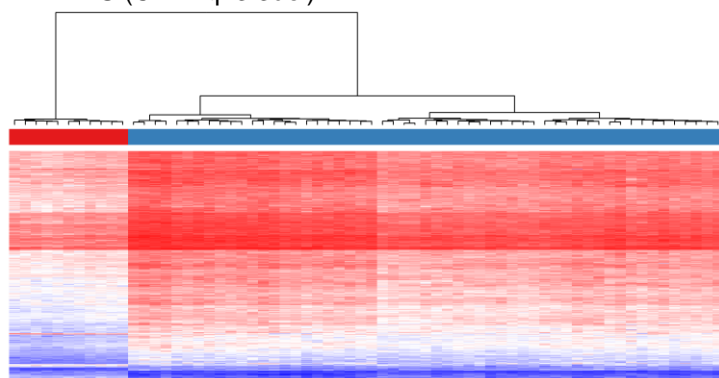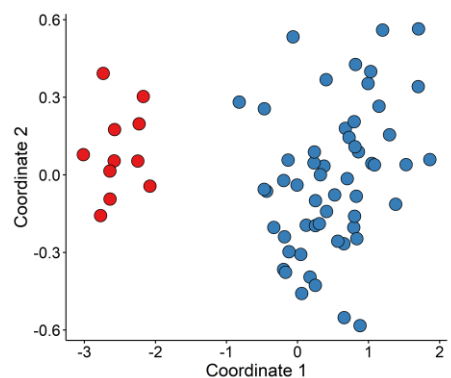

Figure S2 continued

**P. RENS1 (*PQBP1*)**

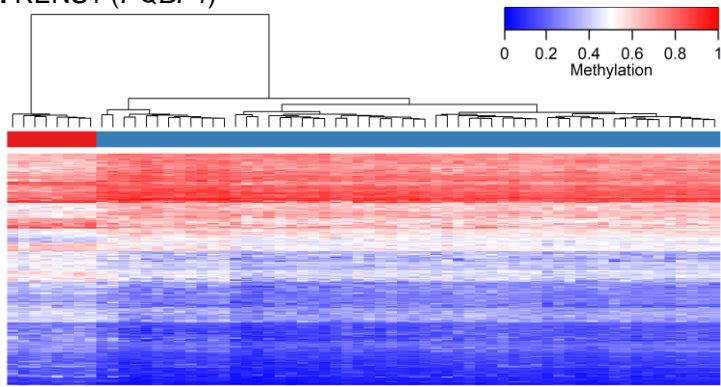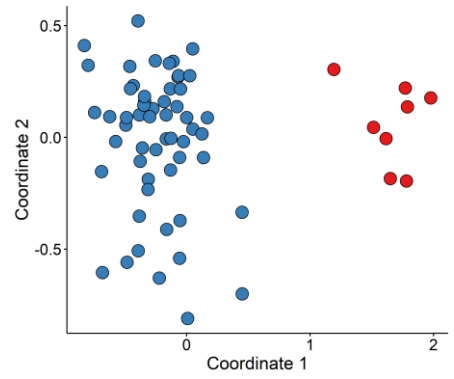

**Q. RSTS1 (*CREBBP*)**

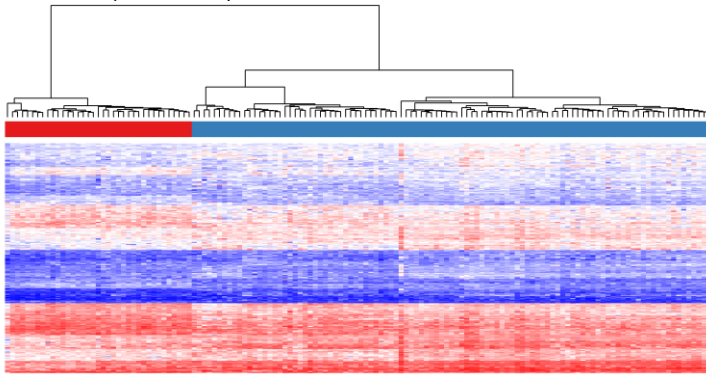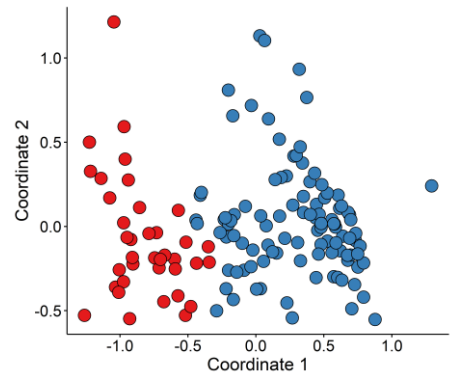

**R. RSTS2 (*EP300*)**

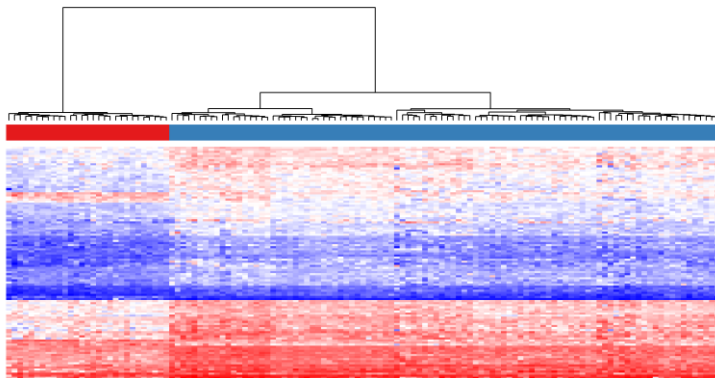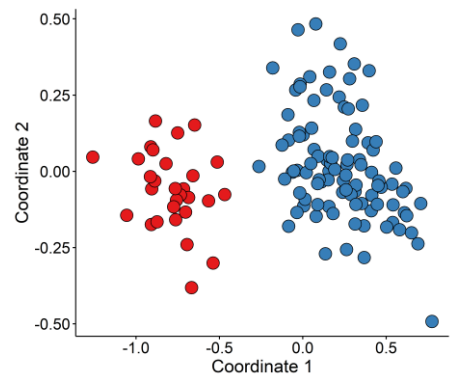

**S. VCFS (Chr22q11.2 del)**

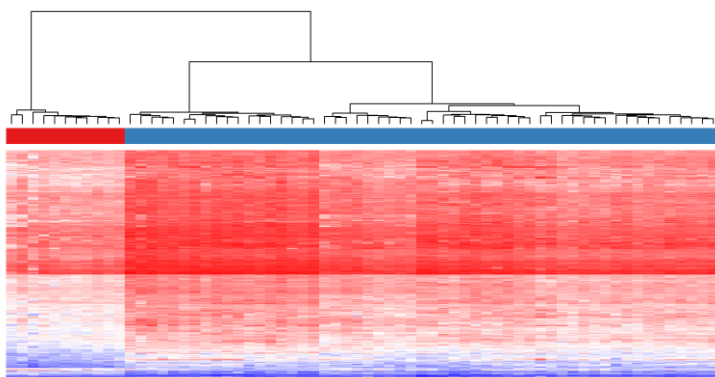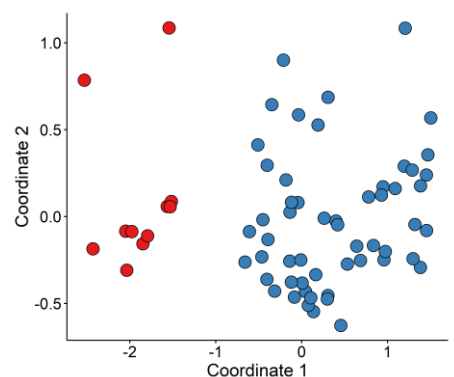

**Figure S2 continued**

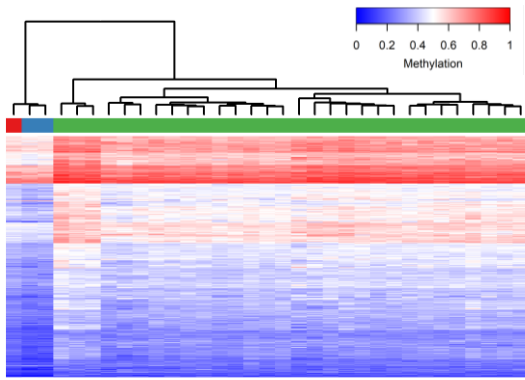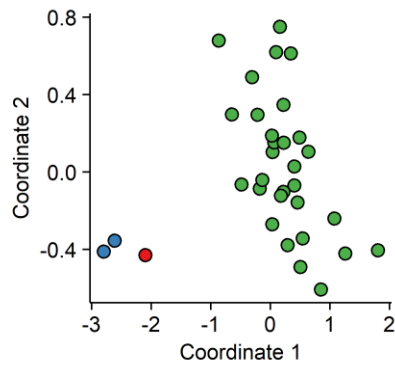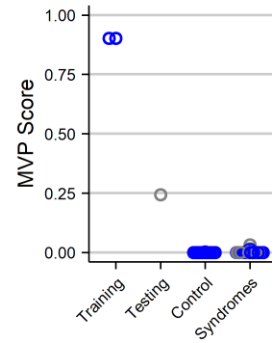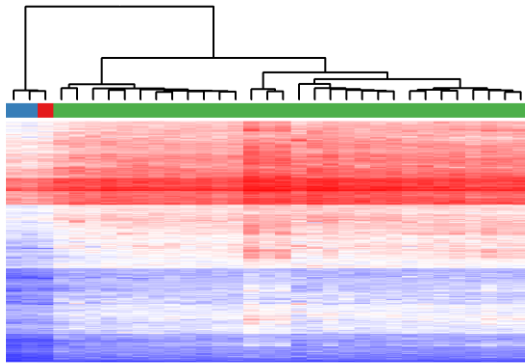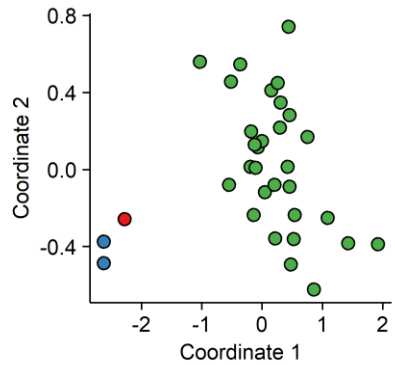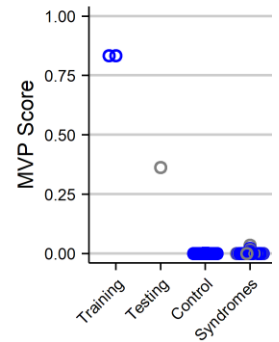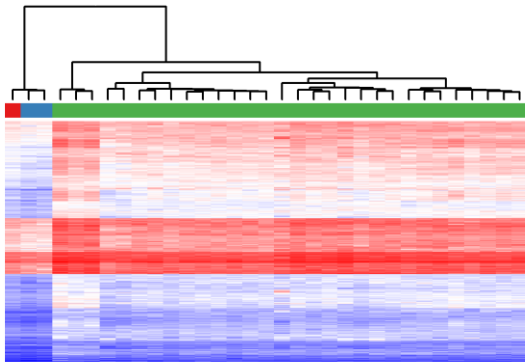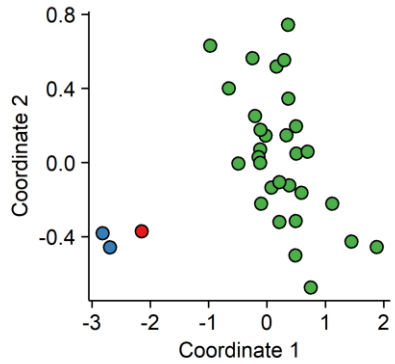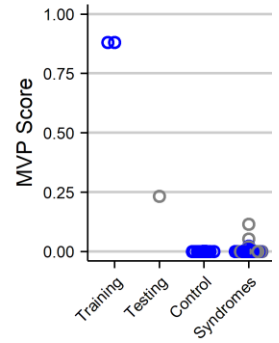

**Supplementary Figure 3: Leave-one-out cross-validation of the three CSS4\_c.2650 samples.** For each round of cross validation two samples were used for probe selection and classifier training and the third sample was used for testing.



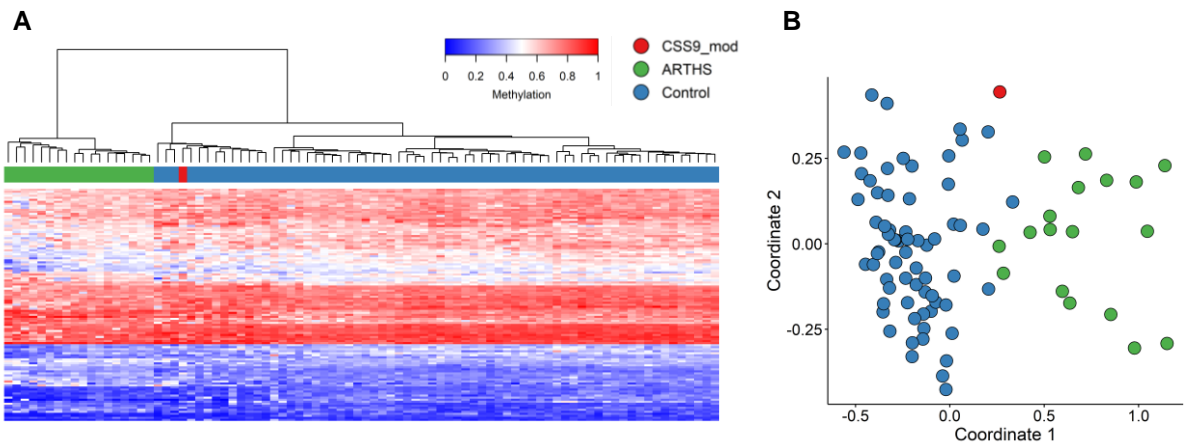

**Supplementary Figure 4: Hierarchical clustering and MDS plots for the assessment of sample 1\_CSS9 for ARTHS.**

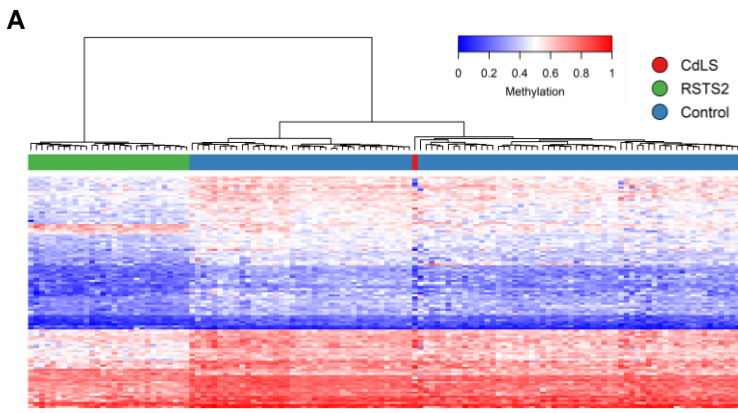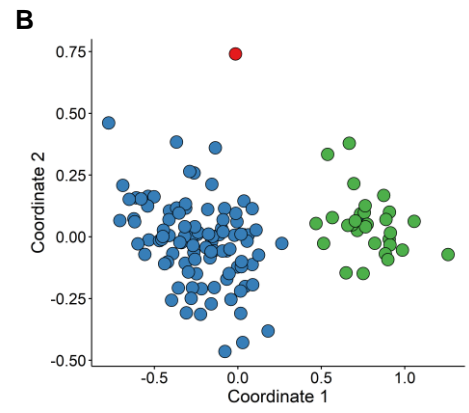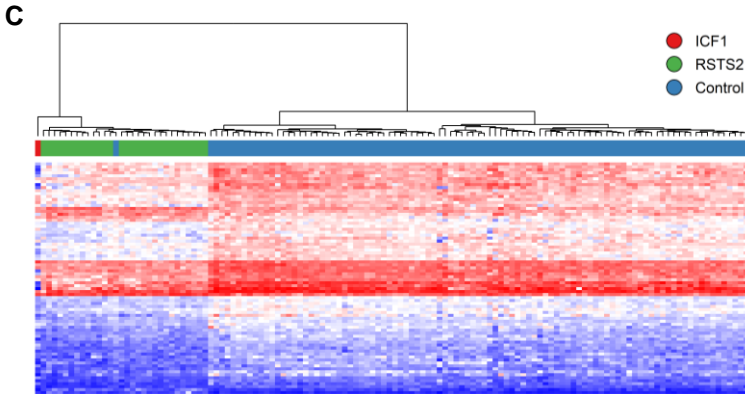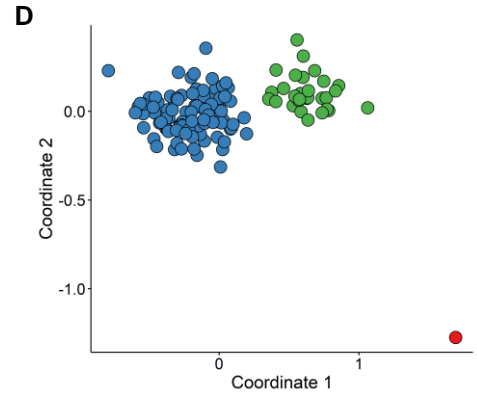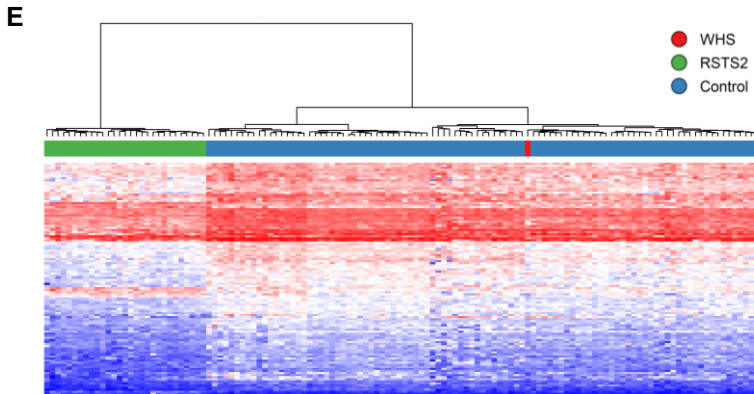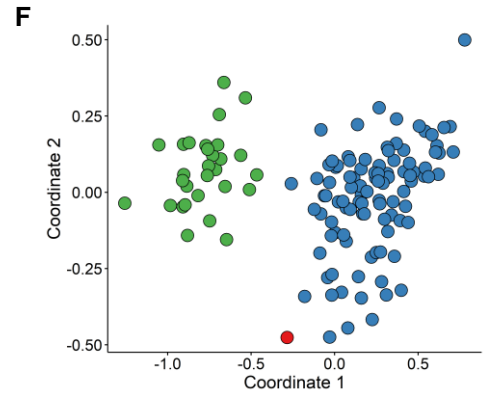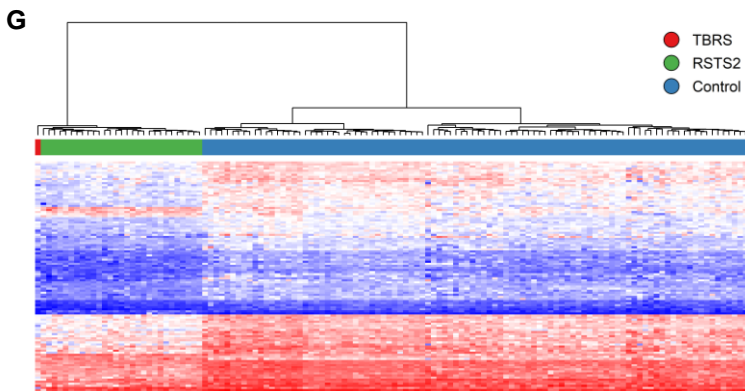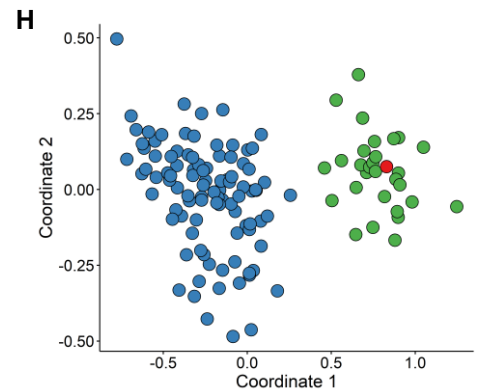

**Supplementary Figure 5: Hierarchical clustering and MDS plots for the assessment of four purportedly non-RSTS2 samples with elevated RSTS MVP scores. A,B. Sample 2\_CdLS. C,D. Sample 4\_ICF1. E,F. Sample 5\_WHS. G,H. Sample 7\_TBRS.**

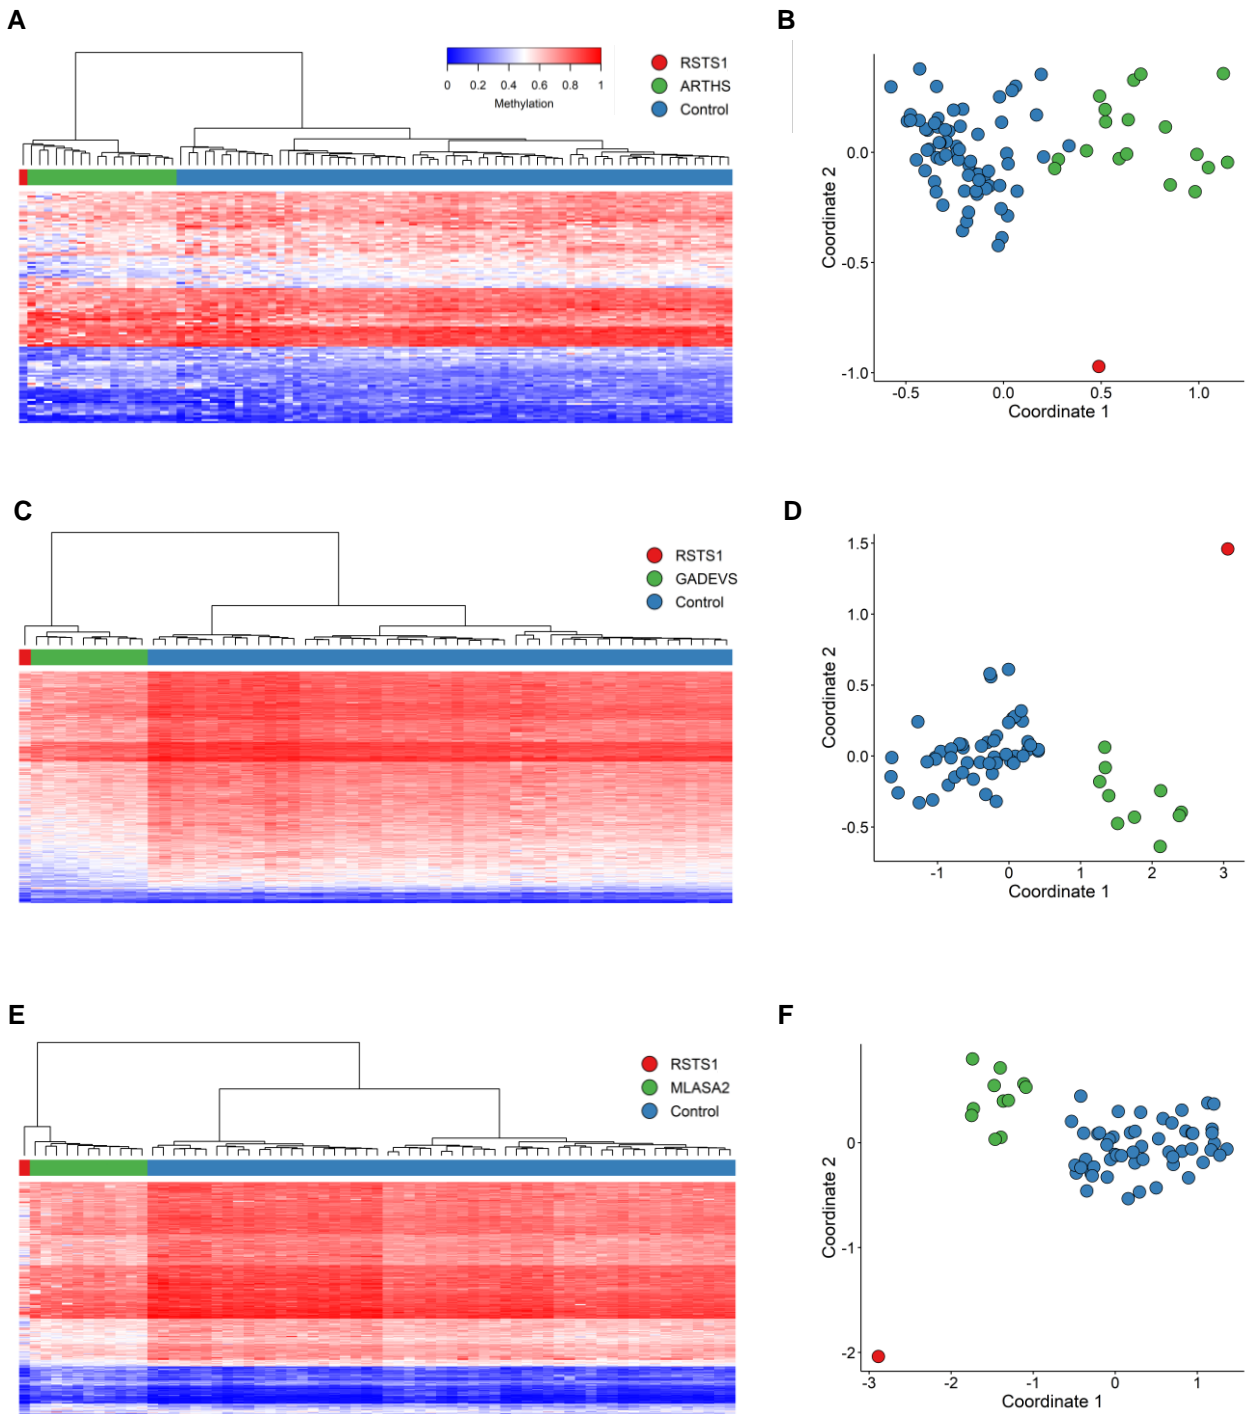

**Supplementary Figure 6: Hierarchical clustering and MDS plots for the assessment of sample 3\_RSTS1 for ARTHS, RSTS1, and MLASA2.**

**A**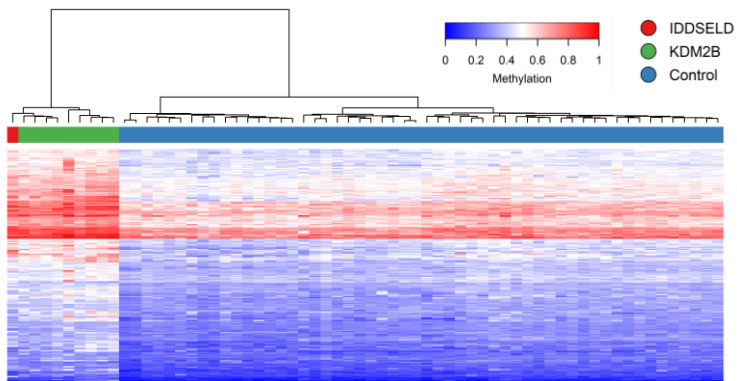**B**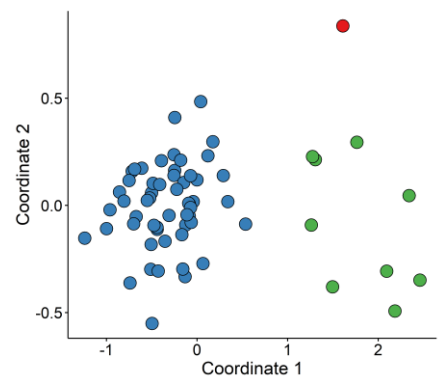

**Supplementary Figure 7: Hierarchical clustering and MDS plots for the assessment of sample 6\_IDDSELD for KDM2B-related syndrome.**

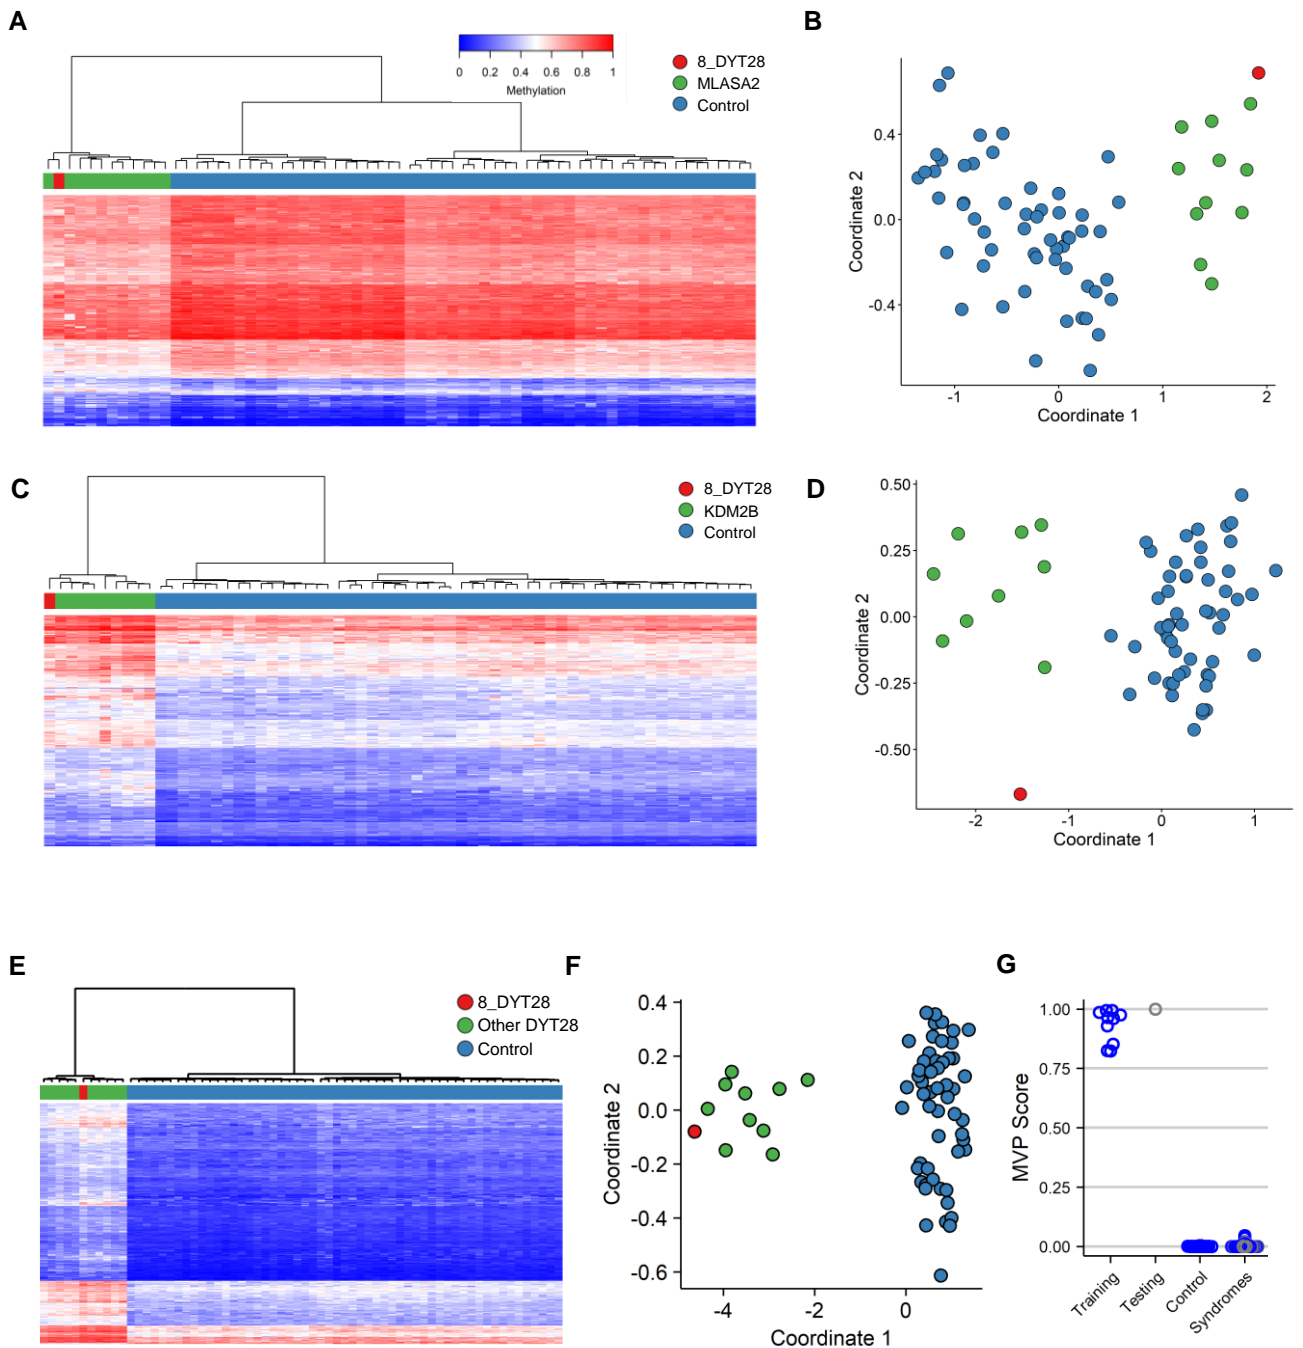

**Supplementary Figure 8: Assessment of sample 8\_DYT28 for MLASA2 and DYT28.** **A.** Hierarchical clustering and **B.** MDS plot for sample 8\_DYT28 plotted using the MLASA2 episignature probes. **C.** Hierarchical clustering and **D.** MDS plot for sample 8\_DYT28 plotted using the KDM2B episignature probes. **E-G.** Leave-one-out sample cross-validation of the DYT28 episignature. Sample 8\_DYT28 is used as the testing sample, the 10 other DYT28 samples were used for training. **E.** Hierarchical clustering. **F.** MDS plot. **G.** SVM classifier results. Syndromes are samples from the 56 other neurodevelopmental syndromes with episignatures. Blue circles are samples used for classifier training (75% of samples), grey circles are samples used for classifier testing (25% of samples).

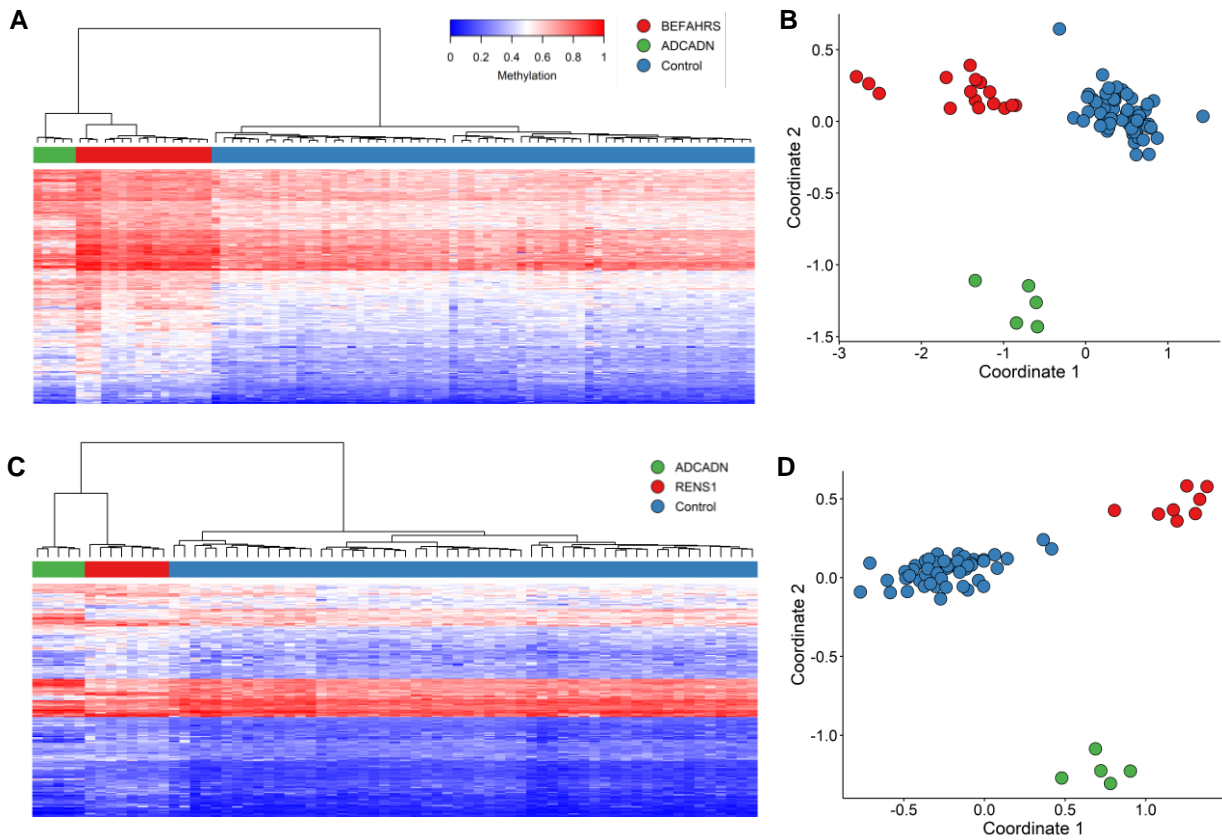

**Supplementary Figure 9: Hierarchical clustering and MDS plots of ADCADN samples. A, B.** using the BEFAHRS epsignature probes. **C, D.** using the RENS1 epsignature probes.

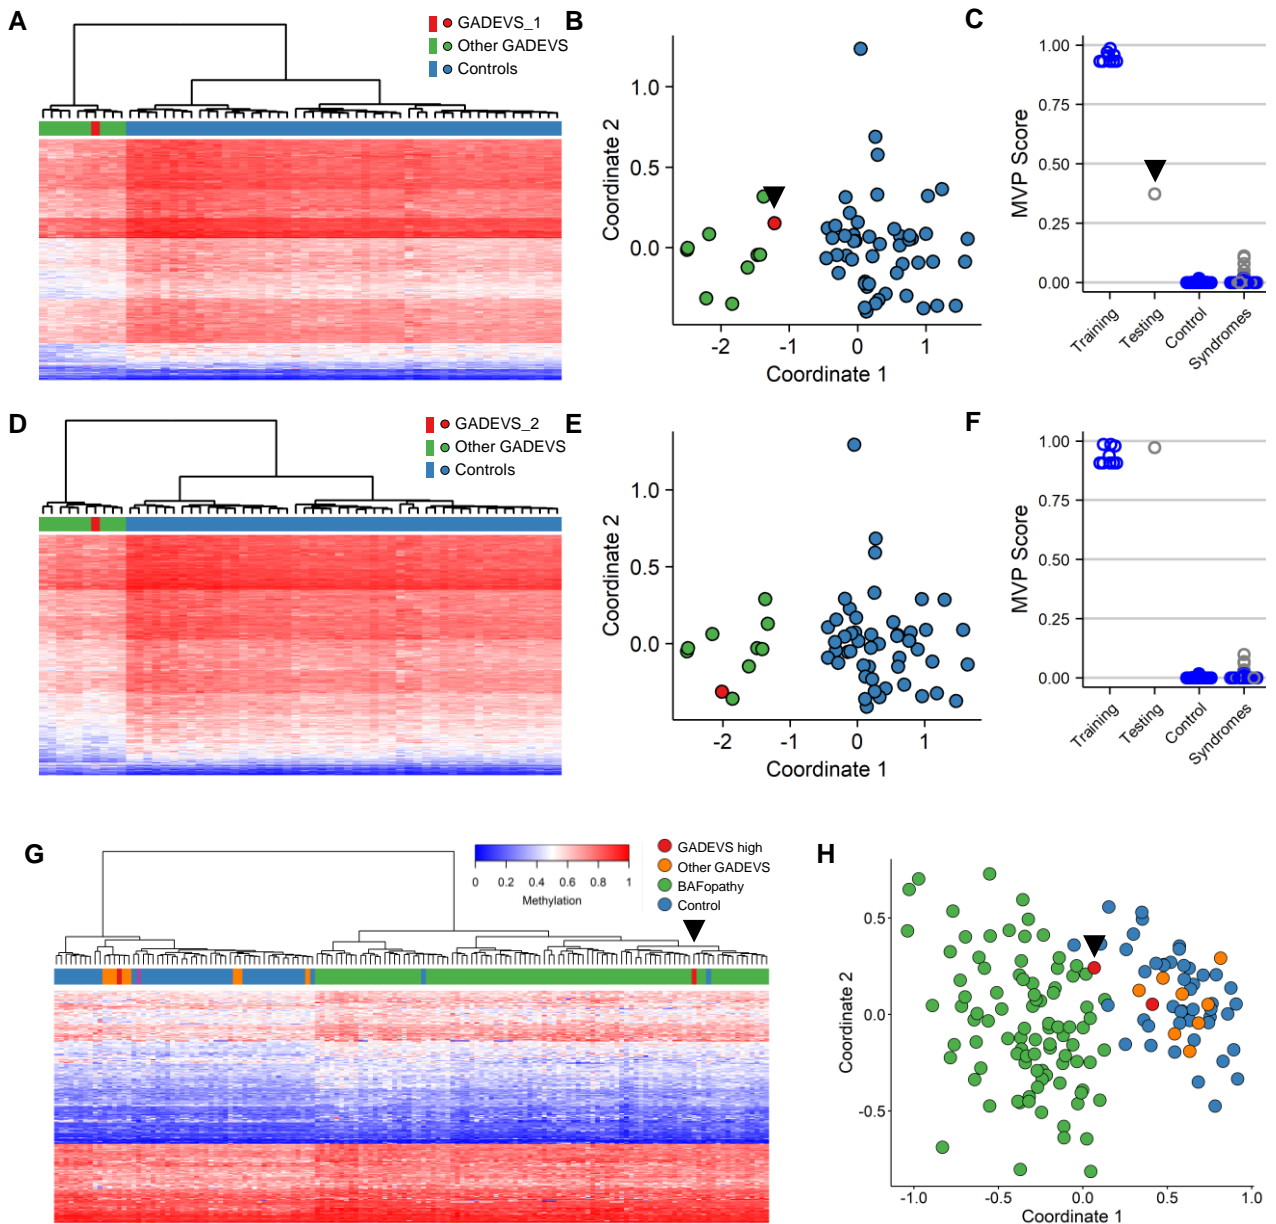

**Supplementary Figure 10: Analysis of two GADEVS samples which had high MVP scores for BAFopathy.** A-F. GADEVS leave-one-out sample cross-validation results, probe selection was repeated each time using nine samples with the one indicated sample used for testing. Sample GADEVS\_1 is marked with a black arrowhead. A,D. Hierarchical clustering. B,D. MDS plot. C,F. SVM classifier results. Syndromes are samples from the 56 other neurodevelopmental syndromes with epismutants. Blue circles are samples used for classifier training (75% of samples), grey circles are samples used for classifier testing (25% of samples). G, Hierarchical clustering and H, MDS plot of all GADEVS samples using the BAFopathy epismutant probes. Sample GADEVS\_1 is marked with a black arrowhead as in A-C.
